# Supplementary material for: Effect of Plasma and Blood Donations on Levels of Perfluoroalkyl and Polyfluoroalkyl Substances in Firefighters in Australia: A Randomized Clinical Trial
Source: PubMed Central journal article supplement (PMC8994130; doi:10.1001/jamanetworkopen.2022.6257), 2022-04-08
Supplement: jamanetwopen-e226257-s003.pdf [file jamanetwopen-e226257-s003.pdf]

## Data Sharing Statement

Gasiorowski. Effect of Plasma and Blood Donations on Levels of Perfluoroalkyl and Polyfluoroalkyl Substances in Firefighters in Australia. *JAMA Netw Open*. Published April 08, 2022. doi:10.1001/jamanetworkopen.2022.6257

### Data

**Data available:** Yes

**Data types:** Deidentified participant data

**How to access data:** The de-identified participant data is available upon written request sent to the corresponding author. Note: Human Research Ethics Committee/IRB approval and signed data access agreement will be required.

**When available:** With publication

### Supporting Documents

**Document types:** None

### Additional Information

**Who can access the data:** Researchers whose proposed use of the data has been approved

**Types of analyses:** Any purpose with Human Research Ethics Committee/IRB approval.

**Mechanisms of data availability:** With a signed data access agreement
